# Supplementary material for: Nurses’ perception on competency requirement and training demand for intensive care nurses
Source: PubMed Central journal article supplement — Int J Nurs Sci. 2022 Jun 16;9(3):350–6. doi: 10.1016/j.ijnss.2022.06.015 (PMC9305005; doi:10.1016/j.ijnss.2022.06.015), 2022-06-16
Supplement: mmc1.pdf [file mmc1.pdf]

## Cuestionario Necesidades formativas de las enfermeras de Cuidados Intensivos.

### Parte A

#### Ámbito Clínico.

En este apartado se busca conocer y fomentar unos cuidados enfermeros que sean seguros y efectivos para el paciente crítico y sus familiares.

|     |                                                                                                                                            |                      |
|-----|--------------------------------------------------------------------------------------------------------------------------------------------|----------------------|
| P1  | Las enfermeras de UCI deben tener conocimientos extensos de enfermería básica                                                              | 1 2 3 4 5 6 7 8 9 10 |
| P2  | Las enfermeras de UCI deben desarrollar habilidades específicas para la atención al paciente crítico                                       | 1 2 3 4 5 6 7 8 9 10 |
| P3  | La observación es una herramienta necesaria, para obtener datos en la valoración del paciente crítico                                      | 1 2 3 4 5 6 7 8 9 10 |
| P4  | La monitorización es una herramienta fundamental, para obtener datos en la valoración del paciente crítico                                 | 1 2 3 4 5 6 7 8 9 10 |
| P5  | El uso de escalas son necesarias para la valoración del paciente crítico                                                                   | 1 2 3 4 5 6 7 8 9 10 |
| P6  | La empatía y el respeto a la intimidad son fundamentales para la enfermera de UCI                                                          | 1 2 3 4 5 6 7 8 9 10 |
| P7  | Hay que involucrar al paciente y a la familia en el proceso de recuperación                                                                | 1 2 3 4 5 6 7 8 9 10 |
| P8  | Observar, analizar e interpretar situaciones y/o problemas en un paciente crítico es necesario para realizar un examen físico.             | 1 2 3 4 5 6 7 8 9 10 |
| P9  | La integración e interrelación de los datos es una habilidad muy importante de las enfermeras de UCI                                       | 1 2 3 4 5 6 7 8 9 10 |
| P10 | Las principales patologías que debe conocer una enfermera de UCI, son la cardíaca, la respiratoria y la neurológica                        | 1 2 3 4 5 6 7 8 9 10 |
| P11 | Las medidas de soporte son el pilar fundamental de las actividades enfermeras                                                              | 1 2 3 4 5 6 7 8 9 10 |
| P12 | Las enfermeras de UCI deben estar formadas en la atención de los distintos tipos de shock                                                  | 1 2 3 4 5 6 7 8 9 10 |
| P13 | El cálculo de fármacos y drogas, es una competencia imprescindible                                                                         | 1 2 3 4 5 6 7 8 9 10 |
| P14 | El cuidado integral de un paciente crítico forma parte de la actuación principal del profesional de enfermería                             | 1 2 3 4 5 6 7 8 9 10 |
| P15 | Los cuidados respiratorios son los que de manera prioritaria deben ser desarrollados en las enfermeras de UCI                              | 1 2 3 4 5 6 7 8 9 10 |
| P16 | La reevaluación continua es la principal medida que debe implementar la enfermera para evaluar estrategias de mejora del plan de cuidados. | 1 2 3 4 5 6 7 8 9 10 |
| P17 | La capacidad de priorización es una habilidad imprescindible                                                                               | 1 2 3 4 5 6 7 8 9 10 |
| P18 | El razonamiento clínico (que pasa, y que puede llegar a pasar) debe ser fomentado en las enfermeras de UCI                                 | 1 2 3 4 5 6 7 8 9 10 |

### Ámbito Profesional.

En este apartado, se busca fomentar y potenciar la práctica profesional en cuidados intensivos.

|     |                                                                                                                                                                 |                      |
|-----|-----------------------------------------------------------------------------------------------------------------------------------------------------------------|----------------------|
| P19 | Ante situaciones complejas, la ayuda y el apoyo de compañeros más experimentados ayudan a resolver problemas                                                    | 1 2 3 4 5 6 7 8 9 10 |
| P20 | Las enfermeras pueden hacer frente a decisiones complejas gracias a la experiencia laboral obtenida en UCI                                                      | 1 2 3 4 5 6 7 8 9 10 |
| P21 | Las decisiones de cuidado son muy complejas y requieren de una formación extensa                                                                                | 1 2 3 4 5 6 7 8 9 10 |
| P22 | Las enfermeras de UCI tienen mucha autonomía, por lo que es necesario una formación reglada y adecuada al puesto de trabajo                                     | 1 2 3 4 5 6 7 8 9 10 |
| P23 | La enfermera de UCI suele afrontar bien la decisión de limitación de soporte vital (esfuerzo terapéutico)                                                       | 1 2 3 4 5 6 7 8 9 10 |
| P24 | La enfermera debería participar en las decisiones de limitación de soporte vital (esfuerzo terapéutico)                                                         | 1 2 3 4 5 6 7 8 9 10 |
| P25 | La enfermera de UCI afronta peor el encarnizamiento terapéutico                                                                                                 | 1 2 3 4 5 6 7 8 9 10 |
| P26 | El afrontamiento de la muerte de los usuarios dependerá de las creencias, experiencias y valores del profesional de enfermería                                  | 1 2 3 4 5 6 7 8 9 10 |
| P27 | El profesional de enfermería en UCI, dentro de su competencia, busca la excelencia a nivel clínico                                                              | 1 2 3 4 5 6 7 8 9 10 |
| P28 | El lenguaje verbal y no verbal son fundamentales en la comunicación en UCI                                                                                      | 1 2 3 4 5 6 7 8 9 10 |
| P29 | En situaciones de estrés, las enfermeras se deben comunicar de manera técnica, concisa y clara, ajustando la información a las características del interlocutor | 1 2 3 4 5 6 7 8 9 10 |
| P30 | Las principales herramientas de comunicación son la asertividad, la empatía y la escucha activa tanto con usuarios y familia como con profesionales             | 1 2 3 4 5 6 7 8 9 10 |
| P31 | Las tecnologías de la información y comunicación (TIC) son herramientas esenciales que permiten la formación, el aprendizaje y el desarrollo de la profesión    | 1 2 3 4 5 6 7 8 9 10 |
| P32 | La comunicación escrita en UCI se debe fomentar siempre, pues es indispensable para la continuidad de cuidados                                                  | 1 2 3 4 5 6 7 8 9 10 |

### Ámbito de la Gestión.

En este ámbito se busca explorar el desarrollo de conocimientos y habilidades en el campo de la gestión y organización relacionada con las enfermeras de cuidados intensivos.

|     |                                                                                                                             |                      |
|-----|-----------------------------------------------------------------------------------------------------------------------------|----------------------|
| P33 | El seguimiento de los cuidados que prestan las enfermeras es indispensable para la continuidad y evaluación de los cuidados | 1 2 3 4 5 6 7 8 9 10 |
|-----|-----------------------------------------------------------------------------------------------------------------------------|----------------------|

|     |                                                                                                                              |                      |
|-----|------------------------------------------------------------------------------------------------------------------------------|----------------------|
| P34 | Registrar los cuidados prestados es la mejor medida posible para garantizar la continuidad                                   | 1 2 3 4 5 6 7 8 9 10 |
| P35 | La enfermera de UCI actúa de nexo entre los distintos profesionales                                                          | 1 2 3 4 5 6 7 8 9 10 |
| P36 | La coordinación del equipo sanitario es imprescindible                                                                       | 1 2 3 4 5 6 7 8 9 10 |
| P37 | Las enfermeras son capaces de planificar actuaciones a lo largo del turno de trabajo                                         | 1 2 3 4 5 6 7 8 9 10 |
| P38 | Las enfermeras que trabajan en UCI recogen datos relacionados con los indicadores de calidad                                 | 1 2 3 4 5 6 7 8 9 10 |
| P39 | Se realiza un seguimiento de los indicadores de calidad                                                                      | 1 2 3 4 5 6 7 8 9 10 |
| P40 | Es necesaria una correcta formación para garantizar la seguridad clínica                                                     | 1 2 3 4 5 6 7 8 9 10 |
| P41 | Las enfermeras de UCI están involucradas en la seguridad clínica                                                             | 1 2 3 4 5 6 7 8 9 10 |
| P42 | Las enfermeras de UCI deben ser capaces de actuar rápidamente ante el deterioro del usuario y ante eventos adversos          | 1 2 3 4 5 6 7 8 9 10 |
| P43 | Los equipos asistenciales de UCI son capaces de realizar su trabajo en un ambiente de presión y estrés                       | 1 2 3 4 5 6 7 8 9 10 |
| P44 | Se gestiona adecuadamente la carga de trabajo de las enfermeras en UCI                                                       | 1 2 3 4 5 6 7 8 9 10 |
| P45 | En una UCI es fundamental la capacidad de adaptación de las enfermeras en las situaciones urgentes y emergentes              | 1 2 3 4 5 6 7 8 9 10 |
| P46 | Evitar ruidos innecesarios o bajar el volumen de luces y alarmas, son acciones que fomentan el descanso del paciente crítico | 1 2 3 4 5 6 7 8 9 10 |
| P47 | Se fomentan acciones para el adecuado confort y descanso de los pacientes                                                    | 1 2 3 4 5 6 7 8 9 10 |
| P48 | En UCI, se toman medidas que ayudan a prevenir o evitar el delirio o la desorientación                                       | 1 2 3 4 5 6 7 8 9 10 |

### **Ámbito educativo y de desarrollo.**

En este ámbito se centran en explorar las competencias que influye en la educación y el desarrollo de las enfermeras de cuidados intensivos.

|     |                                                                                                       |                      |
|-----|-------------------------------------------------------------------------------------------------------|----------------------|
| P49 | Las enfermeras realizan actividades formativas sobre los cuidados intensivos                          | 1 2 3 4 5 6 7 8 9 10 |
| P50 | La realización de esta formación depende de la motivación de la enfermera                             | 1 2 3 4 5 6 7 8 9 10 |
| P51 | Las actividades formativas repercuten positivamente a nivel clínico                                   | 1 2 3 4 5 6 7 8 9 10 |
| P52 | La institución colabora en una formación específica de UCI                                            | 1 2 3 4 5 6 7 8 9 10 |
| P53 | La acogida de personal de nueva incorporación debe ser realizada lenta y progresivamente              | 1 2 3 4 5 6 7 8 9 10 |
| P54 | La formación en UCI se realiza sobre todo para el cobro de incentivos, bolsas de empleo y oposiciones | 1 2 3 4 5 6 7 8 9 10 |

## Parte B

### Segunda fase. Dimensiones y formación.

En este apartado se busca explorar como se puede mejorar la excelencia de los cuidados tanto del personal novel como veterano.

|     |                                                                                                                                                                                |                      |
|-----|--------------------------------------------------------------------------------------------------------------------------------------------------------------------------------|----------------------|
| P55 | La enfermera de nueva incorporación debería tener conocimientos hemodinámicos, de ventilación mecánica, reanimación cardiopulmonar básica y avanzada, además de monitorización | 1 2 3 4 5 6 7 8 9 10 |
| P56 | Debería existir la figura de un enfermero tutor en la unidad para ayudar a las enfermeras de nueva incorporación                                                               | 1 2 3 4 5 6 7 8 9 10 |
| P57 | Es necesario una formación previa postgrado de UCI para las enfermeras noveles                                                                                                 | 1 2 3 4 5 6 7 8 9 10 |
| P58 | La primera semana, las enfermeras noveles deben estar supervisadas en todo momento                                                                                             | 1 2 3 4 5 6 7 8 9 10 |
| P59 | El personal del staff (veterano), requiere de planes formativos específicos de periodicidad anual                                                                              | 1 2 3 4 5 6 7 8 9 10 |
| P60 | La formación amplia y específica en cuidados críticos, facilita que el profesional alcance un nivel de excelencia                                                              | 1 2 3 4 5 6 7 8 9 10 |
| P61 | La formación se debe apoyar en eventos teórico-prácticos y en la simulación, antes de llevar esos conocimientos a la realidad                                                  | 1 2 3 4 5 6 7 8 9 10 |
| P62 | La formación debe terminar con una intervención real, siempre tutelado con un profesional experimentado                                                                        | 1 2 3 4 5 6 7 8 9 10 |
| P63 | La empatía es una actitud indispensable a desarrollar dentro del equipo sanitario                                                                                              | 1 2 3 4 5 6 7 8 9 10 |
| P64 | Las enfermeras necesitan formación específica para afrontar la muerte de los usuarios                                                                                          | 1 2 3 4 5 6 7 8 9 10 |
| P65 | Son habilidades a desarrollar en las enfermeras de UCI, la calma, ser metódico y resolutivas                                                                                   | 1 2 3 4 5 6 7 8 9 10 |
| P66 | La inteligencia emocional es necesaria de ser desarrollada en las enfermeras de UCI                                                                                            | 1 2 3 4 5 6 7 8 9 10 |

### Datos sociodemográficos

#### Características de su Hospital

Clasificación del Hospital

- Hospital de gestión pública
- Hospital de gestión privada
- Hospital de gestión mixta

Relación con la Universidad

- Hospital Universitario

Hospital No Universitario

Números de camas del Hospital donde se encuentra la UCI

<200 camas

200-500 camas

>500 camas

### Características de la Unidad de Cuidados Intensivos

Tipo de UCI

Cardiológica o Coronaria

Respiratoria

Postquirúrgica

Polivalente

Intermedios

Pediátricos

Médica

Quemados

Trauma

Número de camas de la UCI (respuesta numérica) : \_\_\_\_\_

Ratio Enfermera/Paciente

1:1    1:2    1:3    1:4    1:≥5

Provincia donde esta la UCI donde trabaja:

\_\_\_\_\_

### Sección de Descripción muestral

#### M1. Sexo

Hombre

Mujer

#### M2.Edad (rango de edad, que ocupa en el momento de rellenar esta encuesta)

22-25

26-30

31-35

36-40

40-45

Mayor de 45

#### M3.Años de Experiencia laboral en el campo de la enfermería en cualquier ámbito.

Menos de un año

1-5años

6-10 años

11-15 años

16-20 años

Más de 20 años

#### M4.Años de experiencia como enfermera en Cuidados Intensivos.

Menos de un año

1-5años

6-10 años

11-15 años

16-20 años

Más de 20 años

#### M5.Máximo nivel académico alcanzado por usted.

Diplomatura Universitaria.

- Grado Universitario.
- Experto Universitario.
- Master como título propio de Universidad
- Master Universitario
- Doctorado

**M6.Según su opinión, para empezar a trabajar en UCI es preciso tener algún tipo de experiencia o formación previa.**

- Sí No

**M7.Contestar sólo en el caso de haber contestado “Sí”, la pregunta M6. ¿Qué experiencia mínima previa debieran tener los candidatos antes de comenzar a trabajar como enfermeros de UCI?**

- Experiencia laboral en hospitalización de al menos 1 año.
- Experiencia laboral en hospitalización de al menos 2 años.
- Experiencia laboral en hospitalización de al menos 3 años.
- Experiencia laboral en hospitalización de al menos 4 años.

**M8. Contestar sólo en el caso de haber contestado “Sí”, la pregunta M6. ¿Qué experiencia mínima previa debieran tener los candidatos antes de comenzar a trabajar como enfermeros de UCI?**

- Experiencia laboral en urgencias y/o quirófano de al menos 1 año.
- Experiencia laboral en urgencias y/o quirófano de al menos 2 años.
- Experiencia laboral en urgencias y/o quirófano de al menos 3 años.
- Experiencia laboral en urgencias y/o quirófano de al menos 4 años.

**M9.Según su opinión. ¿Qué formación mínima previa sería aconsejable antes de comenzar a trabajar en UCI?**

- No es necesario ninguna formación extra, salvo la proporcionada en los estudios de enfermería.
- Formación de post-grado con créditos de formación continuada de las profesiones sanitarias.
- Formación de post-grado mediante planes de acogida de las propias unidades
- Formación de post-grado en forma de expertos universitario (Con prácticas incluidas)
- Formación de post-grado en forma de master universitario (Con prácticas incluidas)

**M10.Según su opinión. ¿Sería aconsejable una formación especializada sanitaria tipo EIR (Enfermero Interno Residente), para trabajar en UCI?**

- Sí No

**M11. ¿Existe en su unidad, un plan de acogida del personal de nueva incorporación?**

- Sí No

**M12. Si la respuesta M11, ha sido contestada de forma afirmativa. ¿En qué consiste?**

---

---

---

---

**M13. Según su experiencia personal, ¿Sería necesario un plan de acogida para el personal de nueva incorporación?**

Si    No

**M14. Si la respuesta, M13 ha sido contestada de forma afirmativa. ¿En qué debería consistir?**

---

---

---

---

**Preguntas Control:**

Para asegurar que las respuestas se están haciendo de manera fidedigna, y que se está prestando atención a los enunciados de cada pregunta. Hay dos preguntas intercaladas, de control:

Tras la pregunta P22:

|                                                                                                                        |                      |
|------------------------------------------------------------------------------------------------------------------------|----------------------|
| Si esta rellenando, esta encuesta de manera concienzuda, marque en esta pregunta la respuesta cinco (pregunta control) | 1 2 3 4 5 6 7 8 9 10 |
|------------------------------------------------------------------------------------------------------------------------|----------------------|

Tras la pregunta 43:

|                                                                                                                       |                      |
|-----------------------------------------------------------------------------------------------------------------------|----------------------|
| Si esta rellenando, esta encuesta de manera concienzuda, marque en esta pregunta la respuesta tres (pregunta control) | 1 2 3 4 5 6 7 8 9 10 |
|-----------------------------------------------------------------------------------------------------------------------|----------------------|
