# Supplementary material for: Nurses’ perception on competency requirement and training demand for intensive care nurses
Source: PubMed Central journal article supplement — Int J Nurs Sci. 2022 Jun 16;9(3):350–6. doi: 10.1016/j.ijnss.2022.06.015 (PMC9305005; doi:10.1016/j.ijnss.2022.06.015), 2022-06-16
Supplement: mmc2.pdf [file mmc2.pdf]

## Questionnaire of Training Needs of Intensive Care Nurses

### Part A

#### Clinical domain.

In this section, the aim is to understand and develop nursing care which is safe and effective for the critically ill patient and their relatives.

|     |                                                                                                                                              |                      |
|-----|----------------------------------------------------------------------------------------------------------------------------------------------|----------------------|
| P1  | ICU nurses must have extensive knowledge of basic nursing                                                                                    | 1 2 3 4 5 6 7 8 9 10 |
| P2  | ICU nurses need to develop specific skills for critical patient care                                                                         | 1 2 3 4 5 6 7 8 9 10 |
| P3  | Observation is a necessary tool for obtaining data in the assessment of the critically ill patient                                           | 1 2 3 4 5 6 7 8 9 10 |
| P4  | Monitoring is a fundamental tool for obtaining data in the assessment of the critically ill patient                                          | 1 2 3 4 5 6 7 8 9 10 |
| P5  | The use of scales is required to assess critically ill patients                                                                              | 1 2 3 4 5 6 7 8 9 10 |
| P6  | Empathy and respect for privacy are essential for ICU nurses                                                                                 | 1 2 3 4 5 6 7 8 9 10 |
| P7  | The patient and the family have to be involved in the recovery process                                                                       | 1 2 3 4 5 6 7 8 9 10 |
| P8  | Observing, analysing and interpreting situations and/or problems in a critically ill patient is necessary to perform a physical examination. | 1 2 3 4 5 6 7 8 9 10 |
| P9  | Data integration and interrelation is a very important skill for ICU nurses                                                                  | 1 2 3 4 5 6 7 8 9 10 |
| P10 | The main pathologies that an ICU nurse must know are cardiovascular, respiratory and neurological                                            | 1 2 3 4 5 6 7 8 9 10 |
| P11 | The support measures are the fundamental pillar of the nurses' activities                                                                    | 1 2 3 4 5 6 7 8 9 10 |
| P12 | ICU nurses should be trained in the care of different types of shock                                                                         | 1 2 3 4 5 6 7 8 9 10 |
| P13 | Calculation of drugs and medicines is an essential skill                                                                                     | 1 2 3 4 5 6 7 8 9 10 |
| P14 | Comprehensive care of a critically ill patient is part of the nurse's main area of action                                                    | 1 2 3 4 5 6 7 8 9 10 |
| P15 | Respiratory care is a priority that ICU nurses need to develop                                                                               | 1 2 3 4 5 6 7 8 9 10 |
| P16 | Continual reassessment is the main measure that nurses must implement, in order to assess improvement strategies in the nursing care plan.   | 1 2 3 4 5 6 7 8 9 10 |
| P17 | The ability to prioritize is an essential skill                                                                                              | 1 2 3 4 5 6 7 8 9 10 |
| P18 | Clinical reasoning (what is happening and what can happen) should be encouraged in ICU nurses                                                | 1 2 3 4 5 6 7 8 9 10 |

#### Professional domain.

In this heading, the aim is to encourage and strengthen the professional practice in intensive care.

|     |                                                                                                                                                            |                      |
|-----|------------------------------------------------------------------------------------------------------------------------------------------------------------|----------------------|
| P19 | The help and support from colleagues with more experience helps to solve problems in complex situations                                                    | 1 2 3 4 5 6 7 8 9 10 |
| P20 | Nurses can cope with complex decisions as a result of the work experience they have obtained in the ICU                                                    | 1 2 3 4 5 6 7 8 9 10 |
| P21 | Decisions regarding patient care are very complex and require extensive training                                                                           | 1 2 3 4 5 6 7 8 9 10 |
| P22 | ICU nurses have a lot of autonomy, so it is necessary to get formal training appropriate to the job position                                               | 1 2 3 4 5 6 7 8 9 10 |
| P23 | ICU nurses usually deal well with the decision to limit vital support (therapeutic effort)                                                                 | 1 2 3 4 5 6 7 8 9 10 |
| P24 | Nurses should participate in decisions to limit vital support (therapeutic effort)                                                                         | 1 2 3 4 5 6 7 8 9 10 |
| P25 | Nurses cope worse with futile care                                                                                                                         | 1 2 3 4 5 6 7 8 9 10 |
| P26 | How users confront death will depend on the beliefs, experiences and values of the nursing staff                                                           | 1 2 3 4 5 6 7 8 9 10 |
| P27 | ICU nursing professionals, within their competence, seek excellence at the clinical level                                                                  | 1 2 3 4 5 6 7 8 9 10 |
| P28 | Verbal and non-verbal language are essential in ICU communication                                                                                          | 1 2 3 4 5 6 7 8 9 10 |
| P29 | In stressful situations, nurses must communicate in a technical, concise and clear manner, adjusting the information to the characteristics of the speaker | 1 2 3 4 5 6 7 8 9 10 |
| P30 | The main communication tools are assertiveness, empathy and active listening with users and families, in addition to professionals                         | 1 2 3 4 5 6 7 8 9 10 |
| P31 | Information and communication technologies (ICTs) are essential tools for training, learning and professional development                                  | 1 2 3 4 5 6 7 8 9 10 |
| P32 | Written communication in ICUs must always be encouraged, as it is essential for the continuity of care                                                     | 1 2 3 4 5 6 7 8 9 10 |

### Management domain.

This domain seeks to explore the development of knowledge and skills in the field of management and organization related to intensive care nurses.

|     |                                                                                                                                            |                      |
|-----|--------------------------------------------------------------------------------------------------------------------------------------------|----------------------|
| P33 | Continual reassessment is the main measure that nurses must implement, in order to assess improvement strategies in the nursing care plan. | 1 2 3 4 5 6 7 8 9 10 |
| P34 | To register the care given is the best measure possible to ensure continuity                                                               | 1 2 3 4 5 6 7 8 9 10 |
| P35 | ICU nurses act as a link between the different professionals                                                                               | 1 2 3 4 5 6 7 8 9 10 |
| P36 | A good coordination of the health team is essential                                                                                        | 1 2 3 4 5 6 7 8 9 10 |
| P37 | The nurses are able to plan interventions over the course of their work shift                                                              | 1 2 3 4 5 6 7 8 9 10 |
| P38 | Nurses working in ICU collect data related to quality indicators                                                                           | 1 2 3 4 5 6 7 8 9 10 |

|     |                                                                                                                                      |                      |
|-----|--------------------------------------------------------------------------------------------------------------------------------------|----------------------|
| P39 | Quality indicators are monitored                                                                                                     | 1 2 3 4 5 6 7 8 9 10 |
| P40 | Regular training is necessary to ensure clinical safety                                                                              | 1 2 3 4 5 6 7 8 9 10 |
| P41 | ICU nurses are involved in clinical safety                                                                                           | 1 2 3 4 5 6 7 8 9 10 |
| P42 | ICU nurses must be able to act quickly in the event of patient deterioration and adverse events                                      | 1 2 3 4 5 6 7 8 9 10 |
| P43 | Critical care teams in ICUs are able to conduct their work in a stressful and pressurized environment                                | 1 2 3 4 5 6 7 8 9 10 |
| P44 | Workload for the ICU nurses is managed appropriately                                                                                 | 1 2 3 4 5 6 7 8 9 10 |
| P45 | In an ICU, it is essential that the nurses have the ability to adapt in urgent and emerging situations                               | 1 2 3 4 5 6 7 8 9 10 |
| P46 | To prevent unnecessary noises, dim lights or lower the volume of alarms are actions that promote rest for the critically ill patient | 1 2 3 4 5 6 7 8 9 10 |
| P47 | Appropriate actions for the comfort and rest of patients are encouraged                                                              | 1 2 3 4 5 6 7 8 9 10 |
| P48 | In ICUs, measures are taken to help prevent or avoid delirium or confusion                                                           | 1 2 3 4 5 6 7 8 9 10 |

### Education and Development domain.

In this area, the research is focused on exploring the competencies that affect the education and development of critical care nurses.

|     |                                                                                                      |                      |
|-----|------------------------------------------------------------------------------------------------------|----------------------|
| P49 | The nurses carry out intensive care training activities                                              | 1 2 3 4 5 6 7 8 9 10 |
| P50 | The completion of this training depends on the nurse's motivation                                    | 1 2 3 4 5 6 7 8 9 10 |
| P51 | Training activities have a positive impact at the clinical level                                     | 1 2 3 4 5 6 7 8 9 10 |
| P52 | The institution collaborates on specific ICU training                                                | 1 2 3 4 5 6 7 8 9 10 |
| P53 | New staff must be incorporated slowly and progressively                                              | 1 2 3 4 5 6 7 8 9 10 |
| P54 | Nurses carry out ICU training mainly due to incentive payments, job listings and public examinations | 1 2 3 4 5 6 7 8 9 10 |

### Part B

#### Second phase. Training dimensions.

This chapter seeks to explore how excellence of care could improve for both junior and senior staff.

|     |                                                                                                                                                                        |                      |
|-----|------------------------------------------------------------------------------------------------------------------------------------------------------------------------|----------------------|
| P55 | A newly incorporated nurse should have knowledge on haemodynamics, mechanical ventilation, basic and advanced cardiopulmonary resuscitation, in addition to monitoring | 1 2 3 4 5 6 7 8 9 10 |
| P56 | There should be a nurse tutor in the unit to help new nurses                                                                                                           | 1 2 3 4 5 6 7 8 9 10 |
| P57 | Previous postgraduate ICU training is necessary for new nurses                                                                                                         | 1 2 3 4 5 6 7 8 9 10 |

|     |                                                                                                                                |                      |
|-----|--------------------------------------------------------------------------------------------------------------------------------|----------------------|
| P58 | The first week, new nurses must be supervised at all times                                                                     | 1 2 3 4 5 6 7 8 9 10 |
| P59 | Veteran personnel require specific annual training programmes                                                                  | 1 2 3 4 5 6 7 8 9 10 |
| P60 | Extensive and specific training in critical care makes it easier for professionals to reach their degree of excellence         | 1 2 3 4 5 6 7 8 9 10 |
| P61 | The training must be supported by theoretical and practical events and simulation, before putting this knowledge into practice | 1 2 3 4 5 6 7 8 9 10 |
| P62 | The training must end with a real intervention, always under the supervision of an experienced professional                    | 1 2 3 4 5 6 7 8 9 10 |
| P63 | Empathy is an essential attitude to develop within the health team                                                             | 1 2 3 4 5 6 7 8 9 10 |
| P64 | Nurses need specific training to cope with patients' death                                                                     | 1 2 3 4 5 6 7 8 9 10 |
| P65 | ICU nurses should develop the following skills: to be calm, methodical and decisive                                            | 1 2 3 4 5 6 7 8 9 10 |
| P66 | ICU nurses need to develop emotional intelligence                                                                              | 1 2 3 4 5 6 7 8 9 10 |

### Socio- demographic data

#### Hospital features

Hospital Classification

- Public Management Hospital
- Private Management Hospital
- Mixed Management Hospital

Relations with the university

- University Hospital
- Non- University Hospital

Number of beds in the hospital

- <200 beds
- 200-500 beds
- >500 beds

#### Intensive Care Unit features

Type of ICU

- Cardiology and coronary care
- Respiratory
- Post-surgical
- Multipurpose
- Intermediate care
- Paediatric care
- Medical
- Burns Unit

Trauma Unit

Number of ICU beds (numerical response) : \_\_\_\_\_

Nurse patient ratio

1:1    1:2    1:3    1:4    1:≥5

What state is your ICU located in? :

\_\_\_\_\_

### Sample description section

#### M1. Gender

Male       Woman

#### M2. Age group

22-25yo    26-30yo    31-35yo    36-40yo    40-45yo    More than 45 years old

#### M3. Years of experience as a nurse

Less than one year    1-5 years       6-10 years    11-15 years    16-20 years    More than 20 years

#### M4. Years of experience as a ICU nurse

Less than one year    1-5 years       6-10 years    11-15 years    16-20 years    More than 20 years

#### M5. Highest level of education reached.

- University degree.
- Bachelor degree.
- University expert.
- Master's degree as own university title
- Master of Science in nursing
- Doctorate

#### M6. In your opinion, before start working at the ICU it is necessary to have some previous experience or training

Yes    No

#### M7. Answer only if you have answered "Yes" to question M6. What minimum previous experience should candidates have before starting to work as ICU nurses?

- At least 1 year's work experience in hospitalisation ward.
- At least 2 year's work experience in hospitalisation ward.
- At least 3 year's work experience in hospitalisation ward.
- At least 4 year's work experience in hospitalisation ward.

**M8. Answer only if you have answered "Yes" to question M6. What minimum previous experience should candidates have before starting to work as ICU nurses?**

- At least one year work experience in the emergency and/or operating room.
- At least two years work experience in the emergency and/or operating room.
- At least three years work experience in the emergency and/or operating room.
- At least four years work experience in the emergency and/or operating room.

**M9. In your personal opinion, what minimum prior training would be advisable before nurses start working in the ICU?**

- No extra education is required, beyond that obtained in nursing studies.
- Postgraduate training with continuing education credits in the health professions.
- Postgraduate training through the units' induction programmes.
- Postgraduate training developed through a university expert (internships included).
- Postgraduate training developed through a master's degree (internships included)

**M10. In your personal opinion, would EIR (Nurse Resident Intern) programme training be necessary to work in the ICU?**

- Yes
- No

**M11. Does your unit have an induction plan for new recruits?**

- Yes
- No

**M12. If the answer to M11 is yes, what does this plan include?**

---

---

---

---

**M13. In your personal experience, would an induction plan for new staff be necessary?**

- Yes
- No

**M14. If the answer to M13 is yes, what should this reception plan consist of?**

---

---

---

---

**Control questions:**

In order to ensure the quality of responses, there are two control questions throughout the questionnaire. After the question P22:

|                                                                                                        |                      |
|--------------------------------------------------------------------------------------------------------|----------------------|
| If you are filling in this survey accurately, please tick answer five in this item (control question). | 1 2 3 4 5 6 7 8 9 10 |
|--------------------------------------------------------------------------------------------------------|----------------------|

After the question P 43:

|                                                                                                         |                      |
|---------------------------------------------------------------------------------------------------------|----------------------|
| If you are filling in this survey accurately, please tick answer three in this item (control question). | 1 2 3 4 5 6 7 8 9 10 |
|---------------------------------------------------------------------------------------------------------|----------------------|
